# Supplementary material for: Microfluidic Contact Lenses
Source: PubMed Central journal article supplement (PMC6607692; doi:10.1002/smll.201704363), 2018-03-09
Supplement: SMLL-14-na-s002.pdf [file SMLL-14-na-s002.pdf]

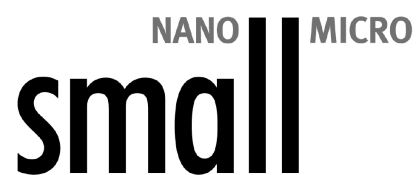

## Supporting Information

for *Small*, DOI: 10.1002/sml.201704363

Microfluidic Contact Lenses

*Nan Jiang, Yunuen Montelongo, Haider Butt, and Ali K. Yetisen\**

## SUPPORTING INFORMATION

# Microfluidic Contact Lenses

*Nan Jiang,<sup>1</sup> Yunuen Montelongo,<sup>2</sup> Haider Butt,<sup>3</sup> Ali K. Yetisen<sup>4,5,6,\*</sup>*

<sup>1</sup> School of Engineering and Applied Sciences, Harvard University, Cambridge,  
Massachusetts 02138, USA

<sup>2</sup> Department of Chemistry, Imperial College London, South Kensington Campus,  
London SW7 2AZ, UK

<sup>3</sup> Nanotechnology Laboratory, School of Engineering, University of Birmingham,  
Birmingham B15 2TT, UK

<sup>4</sup> School of Chemical Engineering, the University of Birmingham, Edgbaston,  
Birmingham B15 2TT, UK

<sup>5</sup> Institute of Translational Medicine, Mindelsohn Way, Edgbaston, Birmingham, B15  
2TH, UK

<sup>6</sup> Harvard-MIT Division of Health Sciences and Technology, Harvard University and  
Massachusetts Institute of Technology, Cambridge, Massachusetts 02139, USA

**KEYWORDS:** Microfluidics; contact lenses; laser ablation; tear film; diagnostics

e-mail: [akyetisen@gmail.com](mailto:akyetisen@gmail.com)

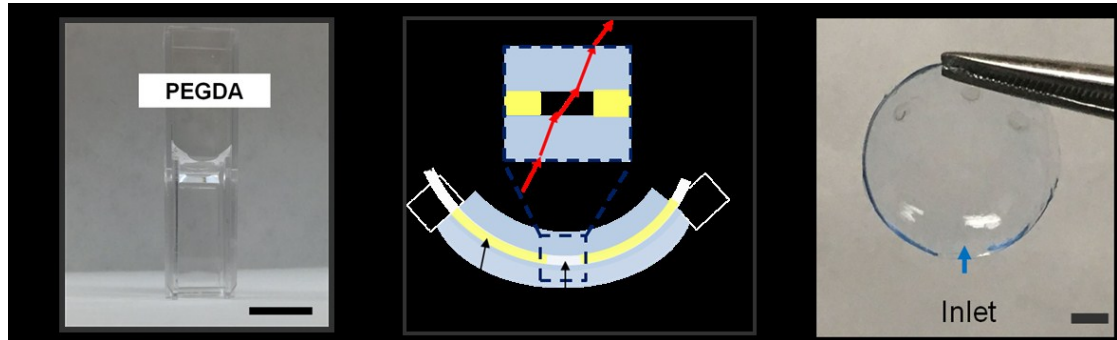

**Figure S1.** Evaluation of transparency of the fabricated microfluidic contact lens. (a) A photograph of the polymerized PEGDA hydrogel. Scale bar=1 cm. (b) Schematic of microfluidic contact lens cross-section. Red arrows show light propagation through the microfluidic contact lens. (c) Top view of microfluidic contact lens. Scale bar= 3 mm.
